# Supplementary material for: Short-term microbial effects of a large-scale mine-tailing storage facility collapse on the local natural environment
Source: PubMed Central journal article supplement (PMC5918821; doi:10.1371/journal.pone.0196032), 2018-04-25
Supplement: pone.0196032.s001.pdf [file pone.0196032.s001.pdf]

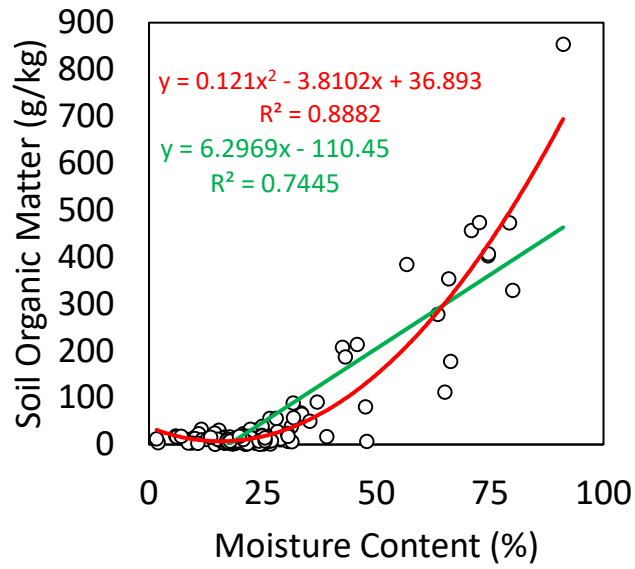

**S1 Figure. Correlation of soil moisture and organic matter contents.** SOM – soil organic matter. Linear (green) and 2<sup>nd</sup> order polynomial (red) contours are included.
