# Supplementary material for: Short-term microbial effects of a large-scale mine-tailing storage facility collapse on the local natural environment
Source: PubMed Central journal article supplement (PMC5918821; doi:10.1371/journal.pone.0196032), 2018-04-25
Supplement: pone.0196032.s002.pdf [file pone.0196032.s002.pdf]

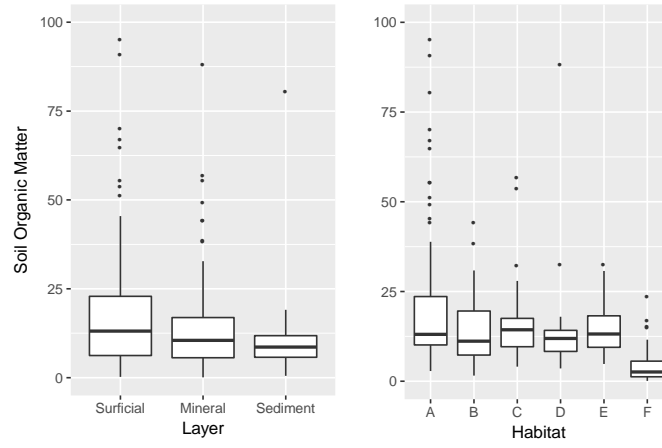

**S2 Figure. Boxplots of SOM (g/kg) contents measures at all sites compared across layers and habitats.**
