# Supplementary material for: Short-term microbial effects of a large-scale mine-tailing storage facility collapse on the local natural environment
Source: PubMed Central journal article supplement (PMC5918821; doi:10.1371/journal.pone.0196032), 2018-04-25
Supplement: pone.0196032.s003.pdf [file pone.0196032.s003.pdf]

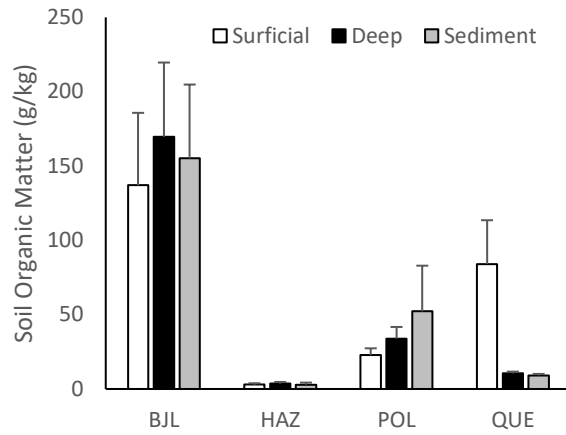

**S3 Figure. Soil Organic Matter (g/kg) comparisons by lake/stream.** Error bars reflect 2X Standard Error.
