# Supplementary material for: Short-term microbial effects of a large-scale mine-tailing storage facility collapse on the local natural environment
Source: PubMed Central journal article supplement (PMC5918821; doi:10.1371/journal.pone.0196032), 2018-04-25
Supplement: pone.0196032.s004.pdf [file pone.0196032.s004.pdf]

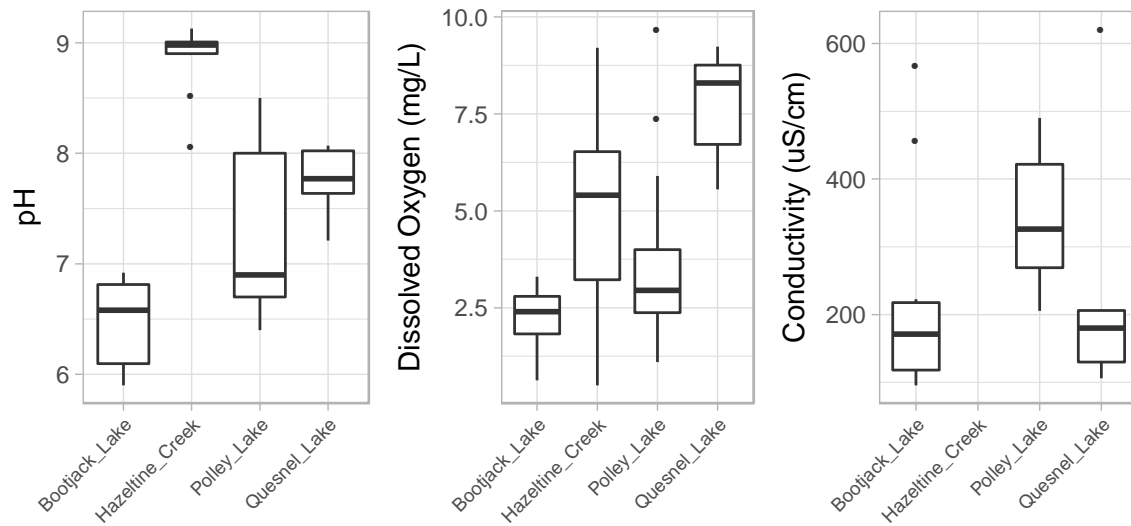

**S4 Figure. Pore water pH, dissolved oxygen (mg/L) and conductivity ( $\mu\text{S}/\text{cm}$ ).** Box-whisker plots reflect medians, quartiles and outliers by lake/stream.
