# Supplementary material for: Short-term microbial effects of a large-scale mine-tailing storage facility collapse on the local natural environment
Source: PubMed Central journal article supplement (PMC5918821; doi:10.1371/journal.pone.0196032), 2018-04-25
Supplement: pone.0196032.s005.pdf [file pone.0196032.s005.pdf]

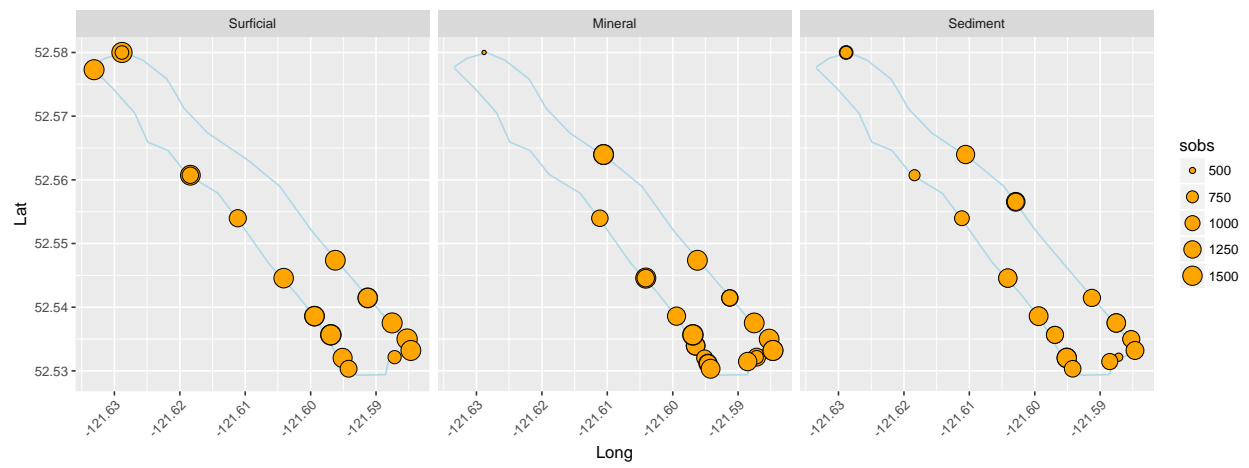

**S5 Figure. Species richness (sobs) in Polley Lake microbiomes.** Point size reflects relative species richness (estimated as number of distinct OTUs).
