# Supplementary material for: Short-term microbial effects of a large-scale mine-tailing storage facility collapse on the local natural environment
Source: PubMed Central journal article supplement (PMC5918821; doi:10.1371/journal.pone.0196032), 2018-04-25
Supplement: pone.0196032.s006.pdf [file pone.0196032.s006.pdf]

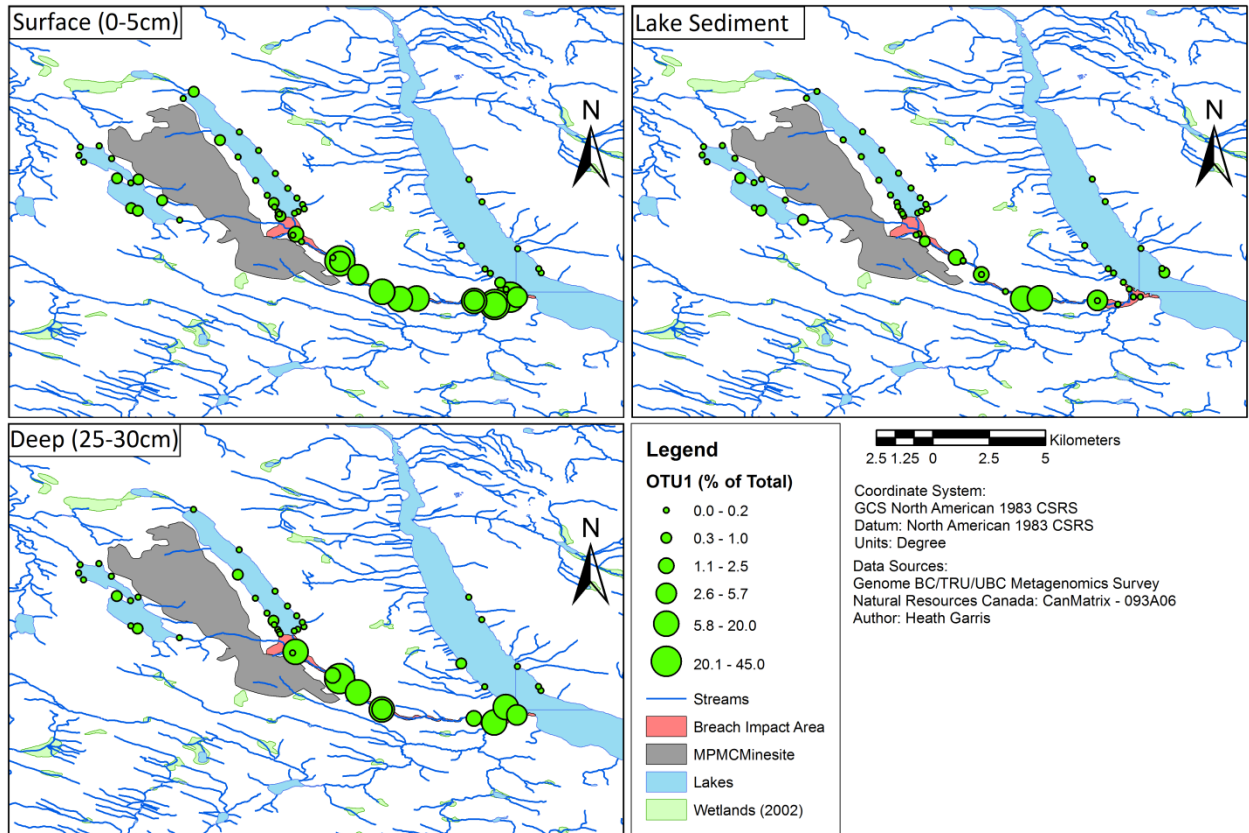

**S6 Figure. Landscape-scale distribution of OTU1.** Relative abundance (% of total bacterial read counts) is expressed for the three sample types.
