# Supplementary material for: Short-term microbial effects of a large-scale mine-tailing storage facility collapse on the local natural environment
Source: PubMed Central journal article supplement (PMC5918821; doi:10.1371/journal.pone.0196032), 2018-04-25
Supplement: pone.0196032.s007.pdf [file pone.0196032.s007.pdf]

**S1 Table. Transect origination coordinates** are provided below for the 60 sites (in decimal degree format) with date, local (Pacific Standard) time of day (TOD) and site ID codes for the biomonitoring network.

| DATE  | TOD   | LAT/LONG (°)          | ID  | DATE   | TOD   | LAT/LONG (°)          | ID  |
|-------|-------|-----------------------|-----|--------|-------|-----------------------|-----|
| 6-Oct | 11:45 | N52.57999, W121.62884 | 1A  | 8-Oct  | 15:34 | N52.54543, W121.65953 | 31A |
| 6-Oct | 12:41 | N52.56072, W121.61839 | 2A  | 8-Oct  | 16:05 | N52.54359, W121.65402 | 32A |
| 6-Oct | 13:44 | N52.55397, W121.61114 | 3A  | 8-Oct  | 16:28 | N52.54499, W121.65102 | 33A |
| 6-Oct | 14:20 | N52.54457, W121.60412 | 4A  | 21-Oct | 9:34  | N52.51374, W121.57317 | 34A |
| 6-Oct | 14:56 | N52.53860, W121.59941 | 5A  | 21-Oct | 10:29 | N52.51228, W121.57035 | 35A |
| 6-Oct | 15:28 | N52.53566, W121.59691 | 6A  | 21-Oct | 10:55 | N52.51247, W121.57034 | 36A |
| 6-Oct | 15:55 | N52.53753, W121.58754 | 7A  | 21-Oct | 12:30 | N52.49656, W121.51662 | 37A |
| 6-Oct | 16:24 | N52.53500, W121.58525 | 8A  | 21-Oct | 13:54 | N52.49495, W121.50851 | 38A |
| 6-Oct | 16:45 | N52.53321, W121.58467 | 9A  | 21-Oct | 12:59 | N52.49648, W121.51669 | 39A |
| 6-Oct | 17:10 | N52.53216, W121.58716 | 10A | 21-Oct | 14:15 | N52.49505, W121.50841 | 40A |
| 6-Oct | 17:30 | N52.53147, W121.58853 | 11A | 21-Oct | 15:32 | N52.50016, W121.55354 | 41A |
| 7-Oct | 11:00 | N52.50383, W121.50623 | 12A | 21-Oct | 15:54 | N52.50021, W121.55341 | 42A |
| 7-Oct | 10:16 | N52.49801, W121.49944 | 13A | 22-Oct | 9:19  | N52.50115, W121.50394 | 43A |
| 7-Oct | 11:34 | N52.50768, W121.48987 | 14A | 22-Oct | 10:02 | N52.49797, W121.50229 | 44A |
| 7-Oct | 12:46 | N52.50932, W121.49087 | 15A | 22-Oct | 11:30 | N52.49749, W121.53968 | 45A |
| 7-Oct | 13:15 | N52.50753, W121.51014 | 16A | 22-Oct | 12:04 | N52.49722, W121.54636 | 46A |
| 7-Oct | 13:43 | N52.50926, W121.51233 | 17A | 22-Oct | 13:15 | N52.50695, W121.56316 | 47A |
| 7-Oct | 14:28 | N52.51730, W121.49928 | 18A | 22-Oct | 13:36 | N52.50697, W121.56307 | 48A |
| 7-Oct | 14:56 | N52.51855, W121.52177 | 19A | 22-Oct | 14:55 | N52.52316, W121.58804 | 49A |
| 7-Oct | 15:28 | N52.53609, W121.51356 | 20A | 22-Oct | 15:08 | N52.52278, W121.58916 | 50A |
| 7-Oct | 16:02 | N52.54501, W121.51871 | 21A | 22-Oct | 15:59 | N52.52017, W121.58575 | 51A |
| 8-Oct | 10:56 | N52.55796, W121.67427 | 22A | 23-Oct | 11:48 | N52.57729, W121.63311 | 52A |
| 8-Oct | 11:20 | N52.55846, W121.66669 | 23A | 23-Oct | 12:21 | N52.56397, W121.61057 | 53A |
| 8-Oct | 11:48 | N52.55463, W121.67474 | 24A | 23-Oct | 12:53 | N52.55655, W121.60291 | 54A |
| 8-Oct | 12:20 | N52.55198, W121.67287 | 25A | 23-Oct | 13:35 | N52.54737, W121.59622 | 55A |
| 8-Oct | 13:02 | N52.55328, W121.66171 | 26A | 23-Oct | 14:00 | N52.54146, W121.59127 | 56A |
| 8-Oct | 13:40 | N52.53669, W121.64145 | 27A | 23-Oct | 14:34 | N52.53395, W121.59649 | 57A |
| 8-Oct | 14:20 | N52.52885, W121.63452 | 28A | 23-Oct | 14:54 | N52.53203, W121.59511 | 58A |
| 8-Oct | 14:30 | N52.53242, W121.65123 | 29A | 23-Oct | 15:20 | N52.53119, W121.59460 | 59A |
| 8-Oct | 15:03 | N52.53355, W121.65391 | 30A | 23-Oct | 15:45 | N52.53034, W121.59420 | 60A |
