# Supplementary material for: Short-term microbial effects of a large-scale mine-tailing storage facility collapse on the local natural environment
Source: PubMed Central journal article supplement (PMC5918821; doi:10.1371/journal.pone.0196032), 2018-04-25
Supplement: pone.0196032.s008.pdf [file pone.0196032.s008.pdf]

**S2 Table. Water Quality Metric Means ± Standard Error.** Fields in grey marked with (--) yielded insufficient data for reliable comparisons (<4 observations).

| Parameter                    | Bootjack Lake |            | Polley Lake |              | Hazeltine Creek |             | Quesnel Lake |           |
|------------------------------|---------------|------------|-------------|--------------|-----------------|-------------|--------------|-----------|
|                              | Surface       | Porewater  | Surface     | Porewater    | Surface         | Porewater   | Surface      | Porewater |
| Temperature (°C)             | 12.6±0.2      | 11.9±0.4   | 11.3±0.4    | 11.1±0.5     | 8.6±0.4         | 16.7±7.3    | 13.5±0.1     | 14.4±0.5  |
| Conductivity (µS/cm)         | 75.3±0.6      | 211.9±42.9 | 186.5±2.8   | 343.2±31.5   | --              | --          | 106.3±0.1    | 236±79    |
| Total Dissolved Solids (g/L) | --            | --         | 0.2±0       | 0.2±0.1      | 8.2±8.8         | 0.2±0.1     | --           | --        |
| Salinity (SAL)               | 0.1±0         | 0.1±0      | 0.1±0       | 0.2±0        | 0.2±0           | 0.2±0.1     | --           | --        |
| DO (%)                       | 90.2±1        | 21±2.3     | 82.1±5.6    | 33±5         | 96±5.5          | 43.8±6.7    | --           | --        |
| DO (mg/L)                    | 9.6±0.1       | 4.7±2.6    | 9.1±0.5     | 3.5±0.5      | 11.1±0.7        | 5±0.8       | 9.8±0        | 7.7±0.6   |
| pH (pH)                      | 7.4±0.1       | 6.5±0.1    | 8.6±0.1     | 7.3±0.2      | 9±0.1           | 8.9±0.1     | 8.3±0.2      | 7.8±0.1   |
| pHmV (pHmV)                  | -44.2±4.6     | 0.7±14.4   | -105.8±3.4  | 4±4.5        | --              | --          | --           | --        |
| ORP (mV)                     | --            | --         | 14.5±27.4   | -52±19.8     | 116±12.2        | 111.3±16.5  | --           | --        |
| Pressure (mmHg)              | 679.3±0.8     | 678.1±0.1  | 683.6±0     | 683.6±0      | --              | 674±0.8     | --           | --        |
| Turbidity (NTU)              | 18.4±13.3     | 1238±145   | 8±2.8       | 1889±369     | --              | --          | --           | --        |
| Nitrate*                     | --            | 0.33±0.05  | 0.22±0.06   | 0.25±0.1     | 0.45±0.12       | 2.34±1.97   | 0.23±0.08    | 1.35±0.73 |
| Phosphorus*                  | --            | 0.03±0.01  | 0.06±0.01   | 0.04±0.01    | 0.06±0.01       | 0.03±0.02   | 0.03±0.01    | 0.03±0.02 |
| Ammonium*                    | --            | 0.34±0.13  | 0.34±0.15   | 1±0.38       | 0.15±0.04       | 0.03±0.03   | 0.01±0.01    | 0.1±0.08  |
| Sulfate*                     | --            | --         | 95.09±10.54 | 124.78±21.13 | 120.53±24.59    | 250.57±91.1 | --           | --        |
| Sulfide**                    | --            | --         | 0±0         | 0±0          | 0±0             | 0±0         | --           | --        |
