# Supplementary material for: Short-term microbial effects of a large-scale mine-tailing storage facility collapse on the local natural environment
Source: PubMed Central journal article supplement (PMC5918821; doi:10.1371/journal.pone.0196032), 2018-04-25
Supplement: pone.0196032.s009.pdf [file pone.0196032.s009.pdf]

**S3 Table. Chemistry of the sediment layer pore water.** Major water bodies are labelled as follows : BJL = Bootjack Lake, HAZ = Hazeltine Creek, POL = Polley Lake, QUE = Quesnel Lake.

| Lake | SiteID  | SO <sub>4</sub> <sup>2-</sup> | NH <sub>4</sub> <sup>+</sup> | PO <sub>4</sub> <sup>3-</sup> | NO <sub>3</sub> <sup>-</sup> | Lake | SiteID  | SO <sub>4</sub> <sup>2-</sup> | NH <sub>4</sub> <sup>+</sup> | PO <sub>4</sub> <sup>3-</sup> | NO <sub>3</sub> <sup>-</sup> |
|------|---------|-------------------------------|------------------------------|-------------------------------|------------------------------|------|---------|-------------------------------|------------------------------|-------------------------------|------------------------------|
| BJL  | 22A     | na                            | 0.1                          | 0                             | 0.22                         | POL  | 1A      | na                            | 1.5                          | 0.08                          | 0.35                         |
| BJL  | 23A     | na                            | 0.2                          | 0                             | 0.1                          | POL  | 2A      | na                            | 0.4                          | 0.07                          | 0                            |
| BJL  | 24A     | na                            | 0                            | 0                             | 0.3                          | POL  | 3A      | na                            | 0.5                          | 0.08                          | 0                            |
| BJL  | 25A     | na                            | 0.4                          | 0                             | 0.43                         | POL  | 4A      | na                            | 0.5                          | 0.08                          | 0.3                          |
| BJL  | 26A     | na                            | 0.1                          | 0.06                          | 0                            | POL  | 5A      | na                            | 0.3                          | 0                             | 0.21                         |
| BJL  | 27A     | na                            | 0.1                          | 0                             | 0.42                         | POL  | 6A      | na                            | 0.7                          | 0.04                          | 0.27                         |
| BJL  | 28A     | na                            | 0.6                          | 0                             | 0.24                         | POL  | 7A      | na                            | 1                            | 0                             | 0.21                         |
| BJL  | 29A     | na                            | na                           | na                            | na                           | POL  | 8A      | na                            | 0.7                          | 0.05                          | 0.26                         |
| BJL  | 30A     | na                            | 0.2                          | 0.04                          | 0.44                         | POL  | 9A      | na                            | 0.8                          | 0.06                          | 0.21                         |
| BJL  | 31A     | na                            | 0.3                          | 0.05                          | 0.53                         | POL  | 10A     | na                            | 0.3                          | 0                             | 0.23                         |
| BJL  | 32A     | na                            | 1.5                          | 0.07                          | 0.46                         | POL  | 11A     | na                            | 1                            | 0.08                          | 0.27                         |
| BJL  | 33A     | na                            | 0.2                          | 0.09                          | 0.46                         | POL  | 52A     | 74                            | 0                            | 0.04                          | 0                            |
| HAZ  | 36A     | 940                           | 0                            | 0.05                          | 8.24                         | POL  | 53A     | 172                           | 0.2                          | 0.07                          | 2.03                         |
| HAZ  | 37A     | 85                            | 0.1                          | 0                             | 0.1                          | POL  | 54A     | 88                            | 0.1                          | 0                             | 0                            |
| HAZ  | 41A     | 154                           | na                           | na                            | na                           | POL  | 55A     | 95                            | 0.1                          | 0                             | 0.35                         |
| HAZ  | 42A     | 73                            | 0                            | 0                             | 0.27                         | POL  | 56A     | na                            | 0.3                          | 0.04                          | 0                            |
| HAZ  | 43A     | 291                           | na                           | na                            | na                           | POL  | 57A     | 85                            | 2                            | 0.07                          | 0                            |
| HAZ  | 45A     | 177                           | na                           | na                            | na                           | POL  | 58A     | 206                           | 0.6                          | 0                             | 0                            |
| HAZ  | 46A     | 140                           | na                           | na                            | na                           | POL  | 59A     | 71                            | 1                            | 0.06                          | 0.34                         |
| HAZ  | 50A     | 317                           | na                           | na                            | na                           | POL  | 60A     | 207                           | 8                            | 0.06                          | 0                            |
| HAZ  | 51A     | 79                            | 0                            | 0.06                          | 0.75                         | QUE  | 12A     | na                            | 0                            | 0                             | 4.11                         |
|      |         |                               |                              |                               |                              | QUE  | 16A     | na                            | 0                            | 0.11                          | 1.28                         |
|      |         |                               |                              |                               |                              | QUE  | 18A     | na                            | 0.1                          | 0                             | 1.15                         |
|      |         |                               |                              |                               |                              | QUE  | 19A     | na                            | 0                            | 0.06                          | 0                            |
|      |         |                               |                              |                               |                              | QUE  | 21A     | na                            | 0.4                          | 0                             | 0.23                         |
| Lake | Metric  | SO <sub>4</sub> <sup>2-</sup> | NH <sub>4</sub> <sup>+</sup> | PO <sub>4</sub> <sup>3-</sup> | NO <sub>3</sub> <sup>-</sup> | Lake | Metric  | SO <sub>4</sub> <sup>2-</sup> | NH <sub>4</sub> <sup>+</sup> | PO <sub>4</sub> <sup>3-</sup> | NO <sub>3</sub> <sup>-</sup> |
| BJL  | Ave     |                               | 0.3                          | 0.03                          | 0.33                         | POL  | Ave     | 125                           | 1                            | 0.04                          | 0.25                         |
|      | Std-dev |                               | 0.4                          | 0.03                          | 0.16                         |      | Std-dev | 56                            | 1.7                          | 0.03                          | 0.43                         |
| HAZ  | Ave     | 251                           | 0.03                         | 0.03                          | 2.34                         | QUE  | Ave     |                               | 0.1                          | 0.03                          | 1.35                         |
|      | Std-dev | 258                           | 0.04                         | 0.03                          | 3.41                         |      | Std-dev |                               | 0.2                          | 0.05                          | 1.47                         |
